# Supplementary material
Source: publisher site journal article supplement (https://www.dovepress.com/get_supplementary_file.php?f=383597.docx)
Supplement: Supplementary file 1 [file get_supplementary_file.php]

**Table S1 Clinical characteristics of****the participants**

| Characteristics |  |
| --- | --- |
| Cases (male/female) | 483 (295/188) |
| Age (years) | 68.82±11.04 |
| Age range (years) | 45-97 |
| Middle-aged adults, n (%) | 211 (43.7%) |
| Age range (years) | 45-64 |
| Older adults, n (%) | 272 (56.3%) |
| Age range (years) | 65-97 |
| BMI (kg/m２) | 25.50±3.19 |
| WC (cm) | 92.92±10.03 |
| Male | 96.33±8.65 |
| Female | 87.56±9.48 |
| eVFA (cm2) | 124.80±46.58 |
| Male | 144.82±41.20 |
| Female | 94.86±37.25 |
| Hypertension (n, %) | 339 (70.2%) |
| T2D (n, %) | 184 (38.1%) |
| CHD (n, %) | 144 (29.8%) |
| Visceral fat obesity (n, %) | 350 (72.5%) |
| Fried frailty phenotype score | 1.04±1.10 |
| Frailty (n, %) | 47 (9.7%) |
| Middle-aged adults | 2 (0.95%) |
| Older adults | 45 (16.5%) |
| CFS score | 4.67±1.37 |

**Note**: Data were expressed as mean (standard deviation), median (interquartile range) or n (%).

**Abbreviations**: BMI, body mass index; WC, waist circumference; eVFA, estimated visceral fat area; T2D, type 2 diabetes; CHD, coronary heart disease; CFS, Clinical Frailty Scale.
